# Supplementary material for: Spatial and Temporal Patterns of Ross River Virus in Queensland, 2001–2020
Source: MDPI journal article supplement (doi:10.3390/tropicalmed6030145), 2021-08-03
Supplement: s1 [file s1]

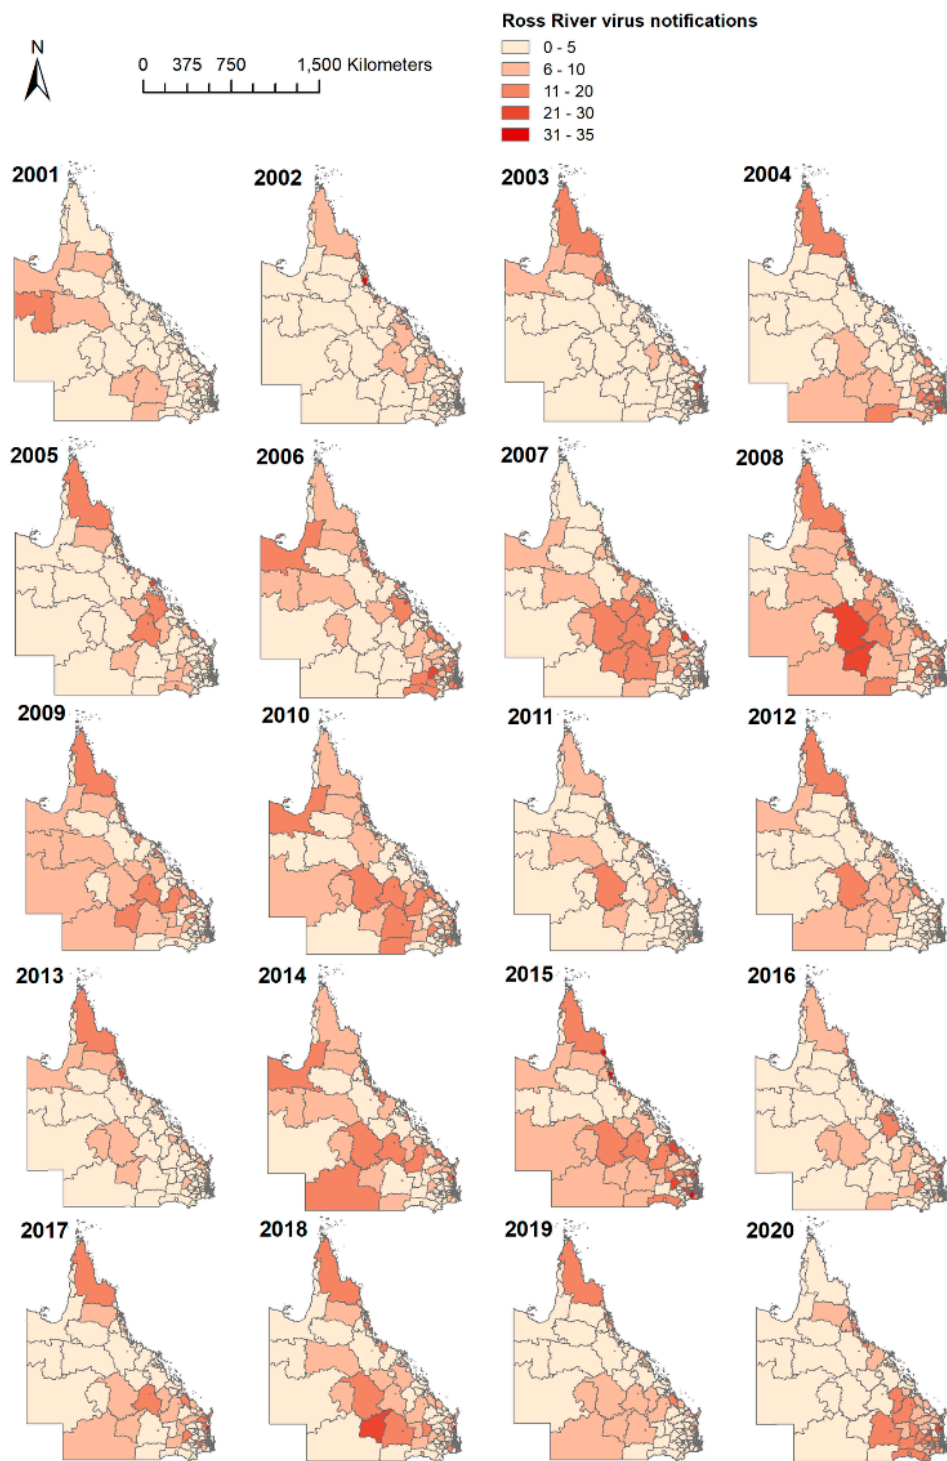

**Figure S1.** Yearly spatial distribution of Ross River virus notifications in Queensland, 2001–2020;.

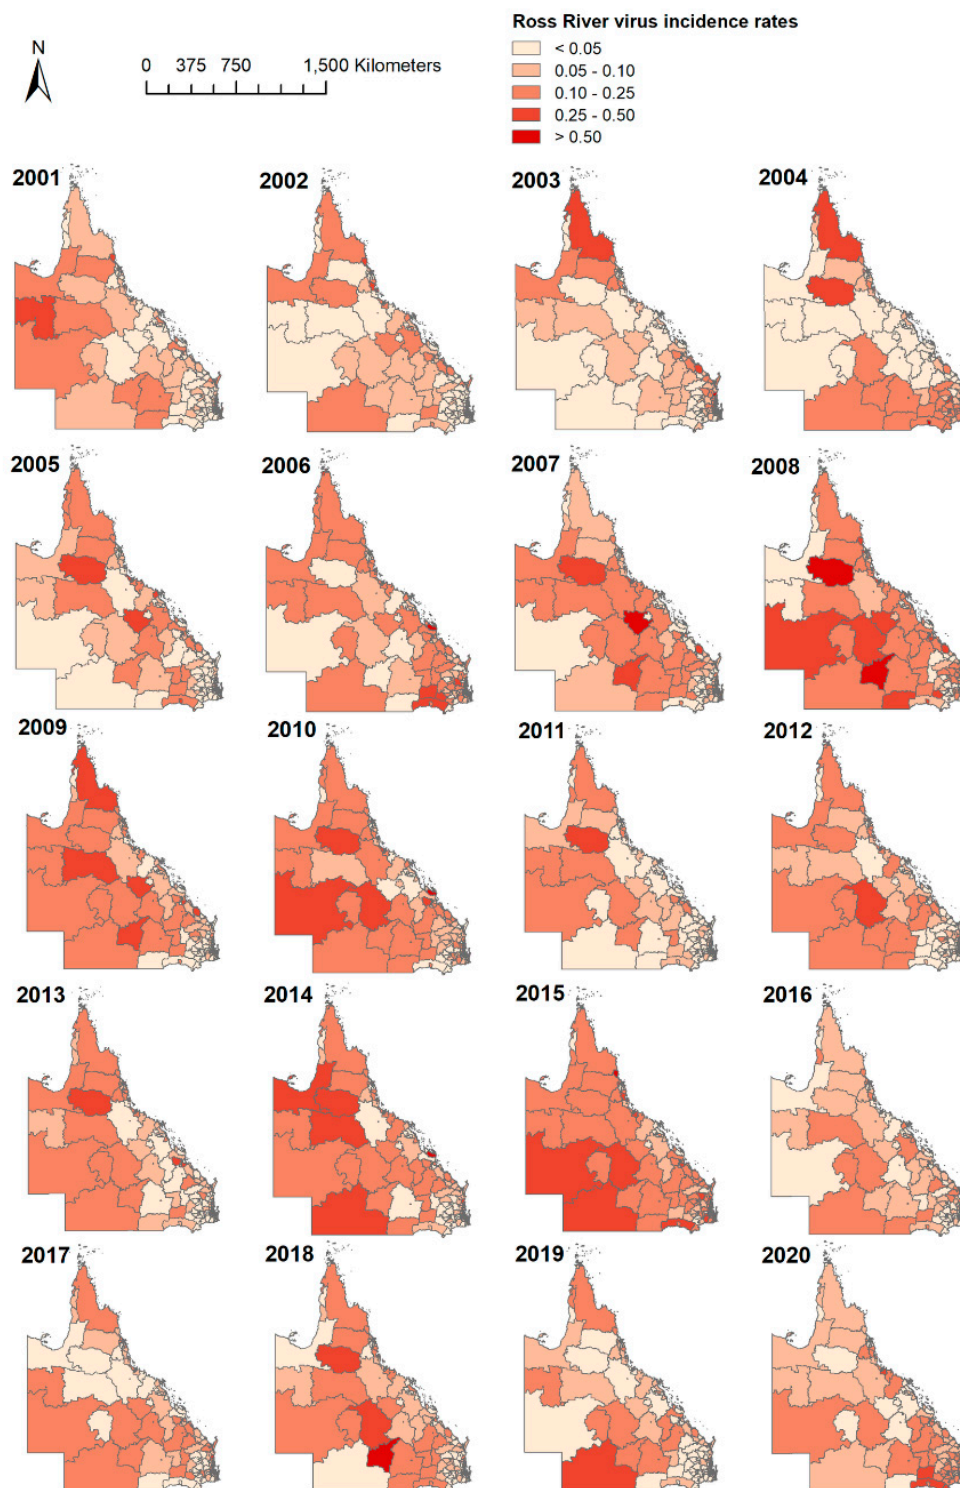

**Figure S2.** Yearly spatial distribution of Ross River virus incidence rates in Queensland, 2001–2020;

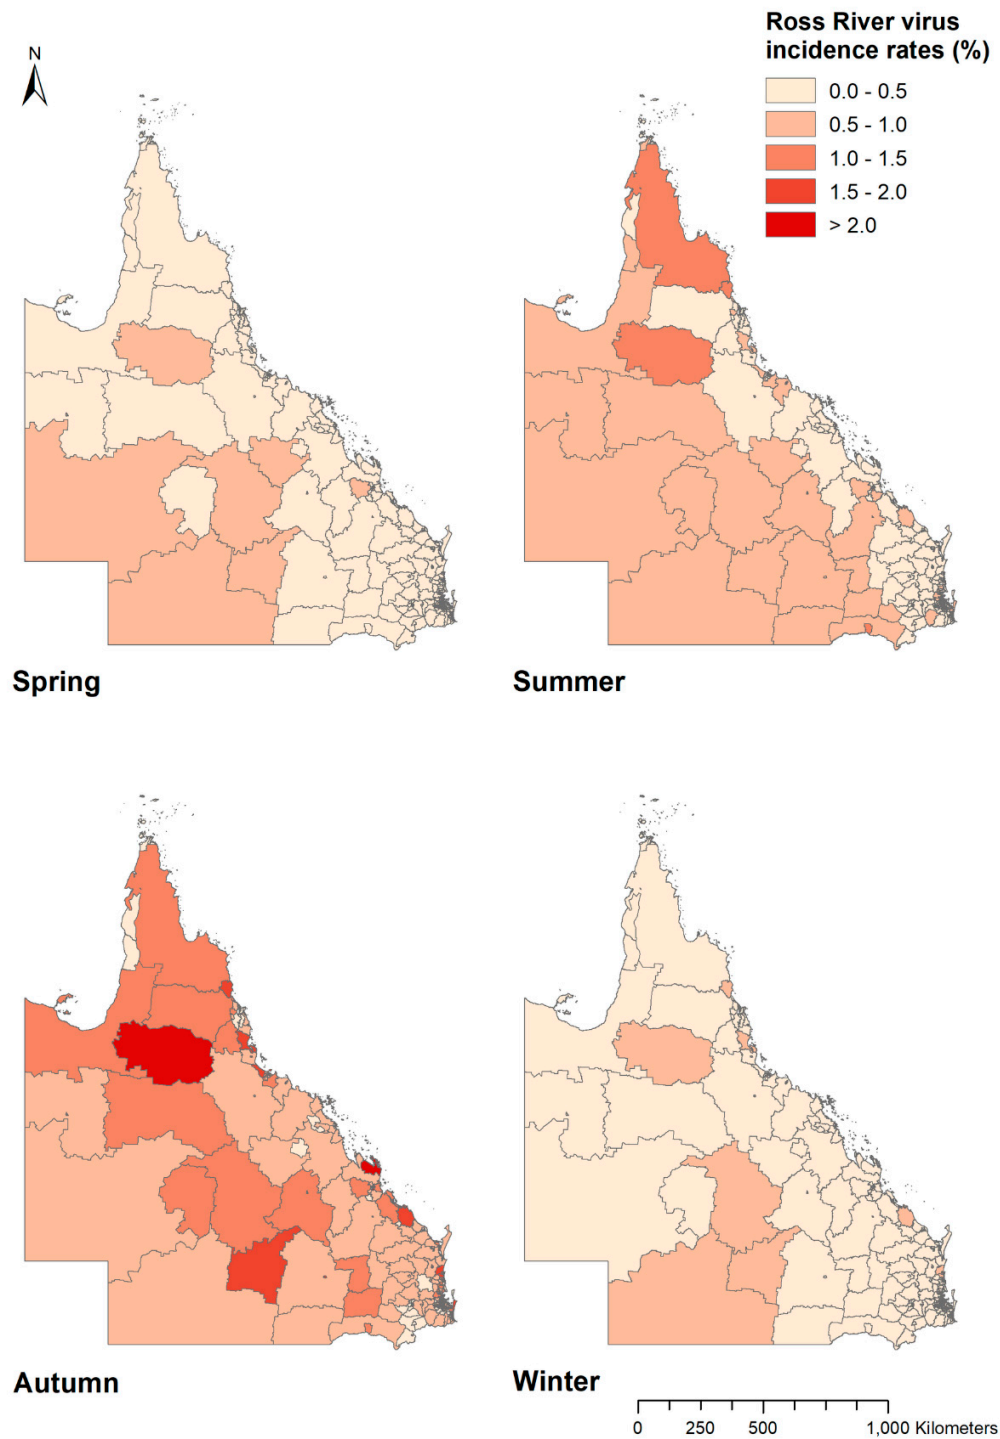

**Figure S3.** Spatial distribution of Ross River virus incidence by season in Queensland, 2001–2020, seasonal incidence rates were calculated as the total number of notifications by season divided by the average population across the study period in each SA2 area

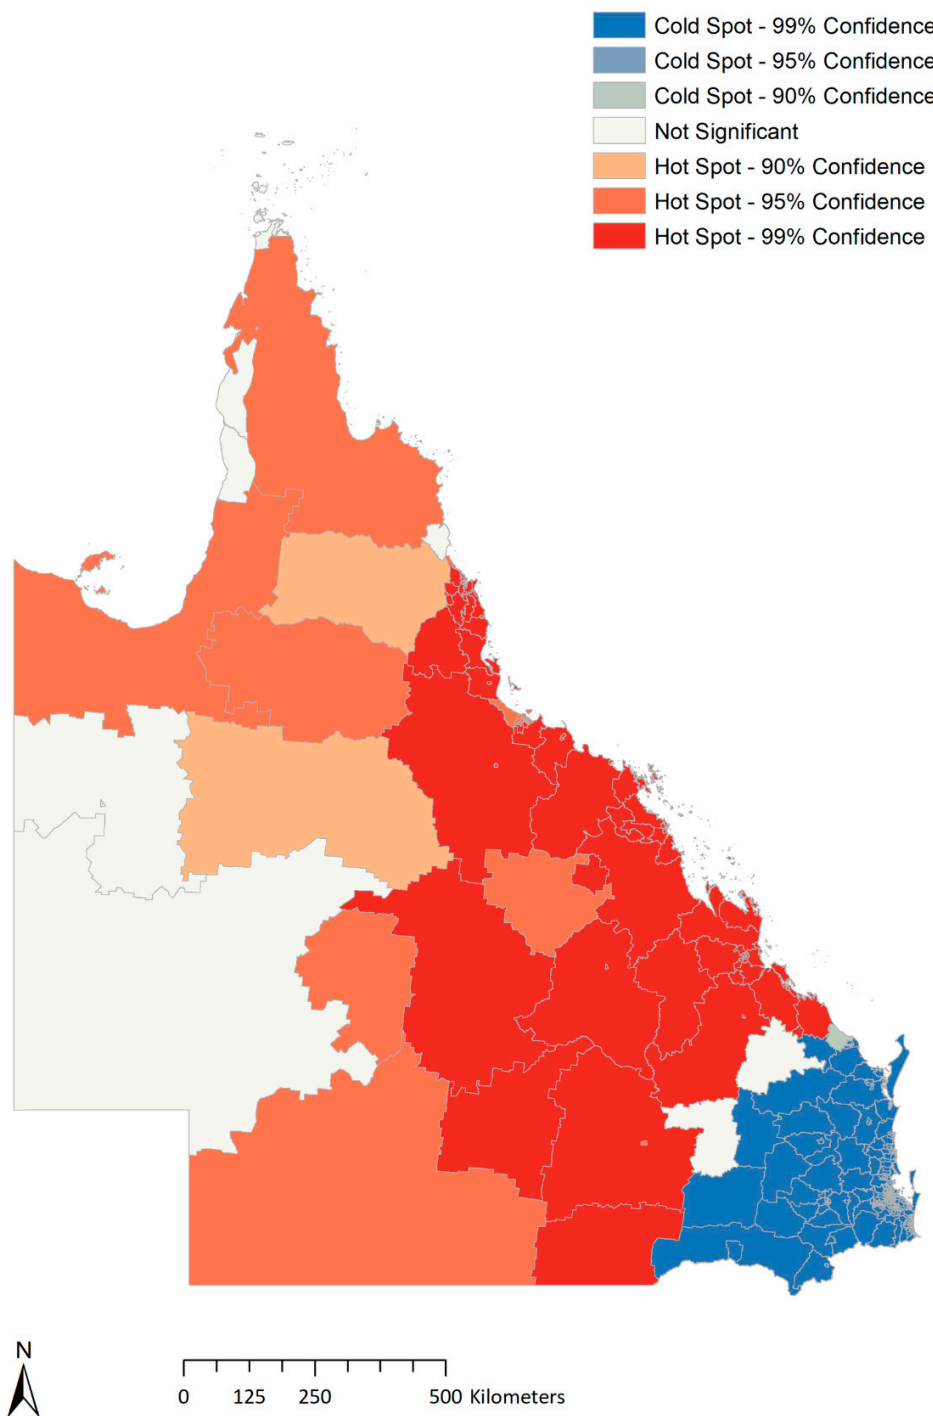

**Figure S4.** Hot spots and cold spots of RRV incidence in Queensland, hot spots and cold spots are statistically significant spatial clusters with high values and low values of the Getis–Ord  $G_i^*$  statistic, respectively

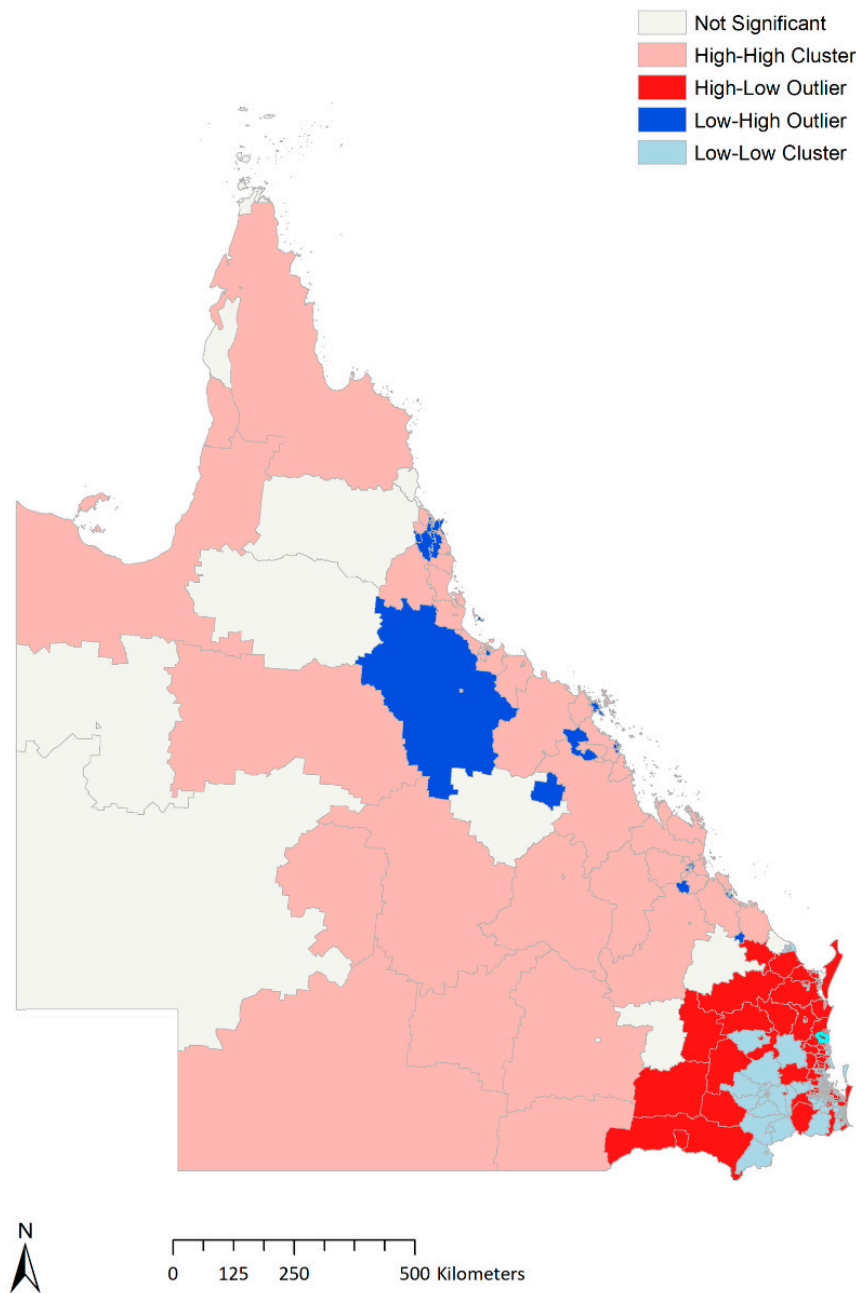

**Figure S5.** Clusters and outliers of RRV incidence in Queensland, clusters and outliers are statistically significant spatial clusters with similar values and dissimilar values of the Local Moran's I statistic, respectively





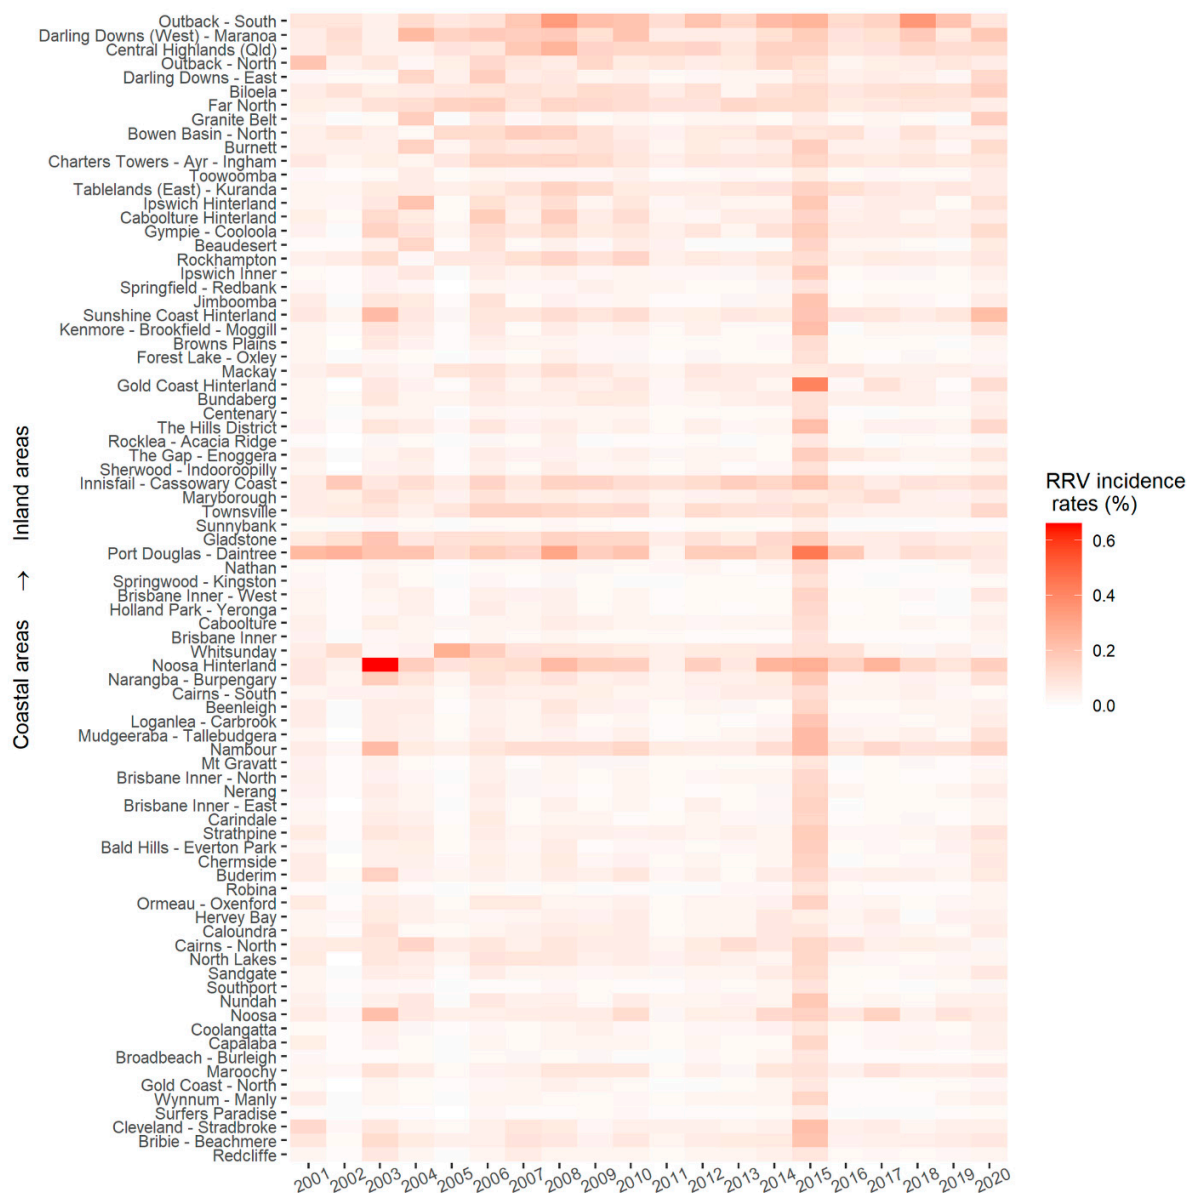

**Figure S7.** Yearly Ross River virus incidence rates in SA3 areas of Queensland, 2001–2020 (ordered by distance to coast); and

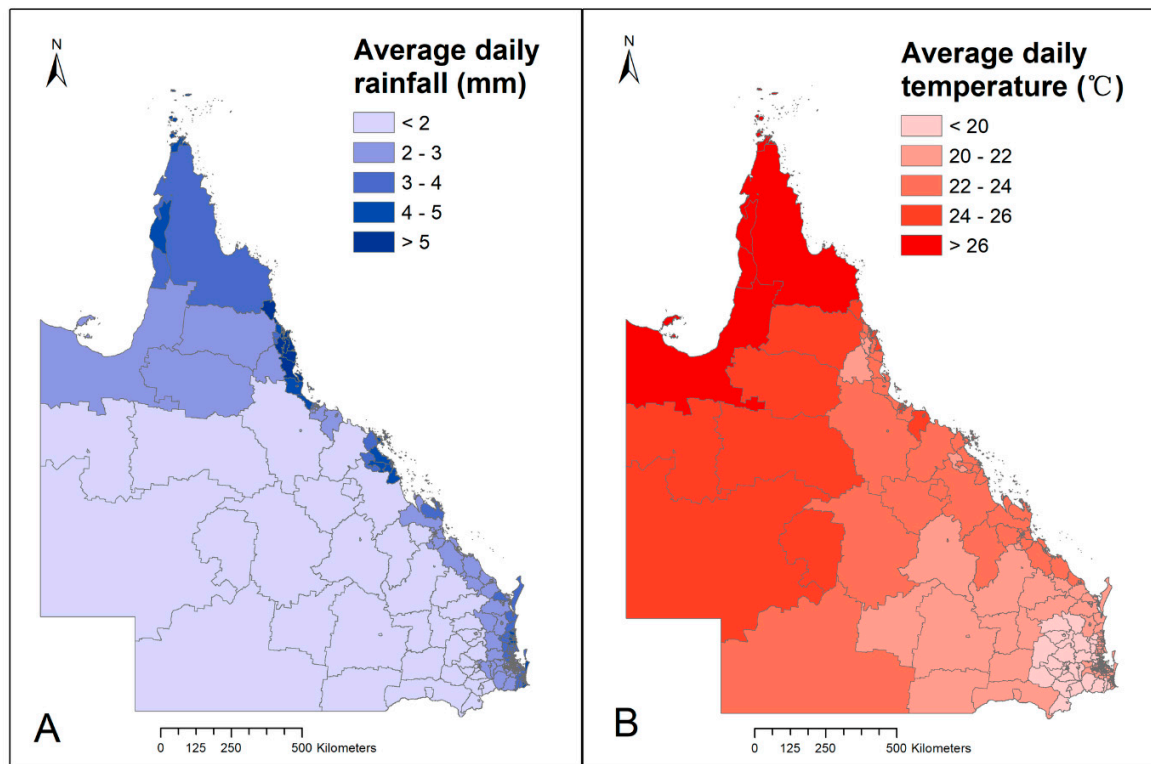

**Figure S8.** Average daily rainfall (mm, A) and daily temperature (°C, B) in SA2 areas of Queensland, 2001–2020.



**Table S1.** The top 100 most cited articles in the field of Rabies virus WOS around the world.

| Rank | Article Title                                                                                                                                                             | Journal                                | Citations |
|------|---------------------------------------------------------------------------------------------------------------------------------------------------------------------------|----------------------------------------|-----------|
| 1    | Routes Of The Thalamus Through The History Of Neuroanatomy                                                                                                                | Neuroscience And Biobehavioral Reviews | 230       |
| 2    | Liquid Biomolecular Condensates And Viral Lifecycles: Review And Perspectives                                                                                             | Viruses-Basel                          | 223       |
| 3    | Reactive Oxygen Species As Potential Antiviral Targets                                                                                                                    | Reviews In Medical Virology            | 181       |
| 4    | The Microbiome Of Bat Guano: For What Is This Knowledge Important?                                                                                                        | Applied Microbiology And Biotechnology | 122       |
| 5    | The Role Of A Mechanistic Host In Maintaining Arctic Rabies Variant Distributions: Assessment Of Functional Genetic Diversity In Alaskan Red Fox ( <i>Vulpes Vulpes</i> ) | Plos One                               | 121       |
| 6    | Characterizing And Evaluating The Zoonotic Potential Of Novel Viruses Discovered In Vampire Bats                                                                          | Viruses-Basel                          | 116       |
| 7    | Cerebellar Projections To The Macaque Midbrain Tegmentum: Possible Near Response Connections                                                                              | Visual Neuroscience                    | 109       |
| 8    | The Synaptic Inputs And Thalamic Projections Of Two Classes Of Layer 6 Corticothalamic Neurons In Primary Somatosensory Cortex Of The Mouse                               | Journal Of Comparative Neurology       | 109       |
| 9    | The European Union One Health 2019 Zoonoses Report                                                                                                                        | Efsa Journal                           | 107       |
| 10   | Application Progress Of Rvg Peptides To Facilitate The Delivery Of Therapeutic Agents Into The Central Nervous System                                                     | Rsc Advances                           | 106       |
| 11   | Increased Callosal Connectivity In Reeler Mice Revealed By Brain-Wide Input Mapping Of Vip Neurons In Barrel Cortex                                                       | Cerebral Cortex                        | 104       |
| 12   | Can Transsynaptic Viral Strategies Be Used To Reveal Functional Aspects Of Neural Circuitry?                                                                              | Journal Of Neuroscience Methods        | 101       |
| 13   | Safe And Effective Two-In-One Replicon-And-Vlp Minispike Vaccine For Covid-19: Protection Of Mice After A Single Immunization                                             | Plos Pathogens                         | 97        |
| 14   | Structural Insights Into Rna Polymerases Of Negative-Sense Rna Viruses                                                                                                    | Nature Reviews Microbiology            | 97        |
| 15   | Addressing Antiretroviral Drug Resistance With Host-Targeting Drugs-First Steps Towards Developing A Host-Targeting Hiv-1 Assembly Inhibitor                              | Viruses-Basel                          | 90        |
| 16   | Design And Validation Of Liposomal Apoe2 Gene Delivery System To Evade Blood-Brain Barrier For Effective Treatment Of Alzheimer's Disease                                 | Molecular Pharmaceutics                | 86        |
| 17   | Bioaccumulation Of Pathogen Exposure In Top Predators                                                                                                                     | Trends In Ecology & Evolution          | 85        |
| 18   | Brain-Wide Mapping Of Presynaptic Inputs To Basolateral Amygdala Neurons                                                                                                  | Journal Of Comparative Neurology       | 83        |
| 19   | Lagos Bat Virus, An Under-Reported Rabies-Related Lyssavirus                                                                                                              | Viruses-Basel                          | 83        |
| 20   | Viral Zoonoses Of National Importance In Ghana: Advancements And Opportunities For Enhancing Capacities For Early Detection And Response                                  | Journal Of Tropical Medicine           | 83        |
| 21   | Rabies: Presentation, Case Management And Therapy                                                                                                                         | Journal Of The Neurological Sciences   | 78        |
| 22   | Tackling The Threat Of Rabies Reintroduction In Europe                                                                                                                    | Frontiers In Veterinary Science        | 75        |
| 23   | Whole-Brain Mapping Of Direct Inputs To Dopamine D1 And D2 Receptor-Expressing Medium Spiny Neurons In The Posterior Dorsomedial Striatum                                 | Eneuro                                 | 74        |
| 24   | Whole-Brain Mapping The Direct Inputs Of Dorsal And Ventral Ca1 Projection Neurons                                                                                        | Frontiers In Neural Circuits           | 70        |
| 25   | Comparison Of Lncrna And Mrna Expression In Mouse Brains Infected By A Wild-Type And A Lab-Attenuated Rabies Lyssavirus                                                   | Journal Of General Virology            | 70        |
| 26   | Street Rabv Induces The Cholinergic Anti-Inflammatory Pathway In Human Monocyte-Derived Macrophages By Binding To Nachr Alpha 7                                           | Frontiers In Immunology                | 69        |
| 27   | Serological Responses Of Raccoons And Striped Skunks To Ontario Rabies Vaccine Bait In West Virginia During 2012-2016                                                     | Viruses-Basel                          | 69        |

|    |                                                                                                                                                                              |                                             |    |
|----|------------------------------------------------------------------------------------------------------------------------------------------------------------------------------|---------------------------------------------|----|
| 28 | Relationships Between Fox Populations And Rabies Virus Spread In Northern Canada                                                                                             | Plos One                                    | 66 |
| 29 | Hierarchy In Sensory Processing Reflected By Innervation Balance On Cortical Interneurons                                                                                    | Science Advances                            | 65 |
| 30 | Modified Live Distemper Vaccines Carry Low Mortality Risk For Captive African Wild Dogs, <i>Lycaon Pictus</i>                                                                | Journal Of Zoo And Wildlife Medicine        | 65 |
| 31 | Glycosylation Is Required For The Neutralizing Activity Of Human IgG1 Antibodies Against Human Rabies Induced By Pre-Exposure Prophylaxis                                    | Immunobiology                               | 63 |
| 32 | Aptamer And Rvg Functionalized Gold Nanorods For Targeted Photothermal Therapy Of Neurotropic Virus Infection In The Mouse Brain                                             | Chemical Engineering Journal                | 62 |
| 33 | Towards Development Of An Anti-Vampire Bat Vaccine For Rabies Management: Inoculation Of Vampire Bat Saliva Induces Immune-Mediated Resistance                               | Viruses-Basel                               | 62 |
| 34 | Multi-Annual Performance Evaluation Of Laboratories In Post-Mortem Diagnosis Of Animal Rabies: Which Techniques Lead To The Most Reliable Results In Practice?               | Plos Neglected Tropical Diseases            | 61 |
| 35 | Short Term Safety, Immunogenicity, And Reproductive Effects Of Combined Vaccination With Anti-GnRh (Gonacon) And Rabies Vaccines In Female Feral Cats                        | Frontiers In Veterinary Science             | 60 |
| 36 | Innate Inhibiting Proteins Enhance Expression And Immunogenicity Of Self-Amplifying Rna                                                                                      | Molecular Therapy                           | 60 |
| 37 | Rabies Virus Matrix Protein Targets Host Actin Cytoskeleton: A Protein-Protein Interaction Analysis                                                                          | Pathogens And Disease                       | 58 |
| 38 | Chimeric VlpS Based On Hiv-1 Gag And A Fusion Rabies Glycoprotein Induce Specific Antibodies Against Rabies And Foot-And-Mouth Disease Virus                                 | Vaccines                                    | 57 |
| 39 | Monosynaptic Retrograde Tracing From Prelimbic Neuron Subpopulations Projecting To Either Nucleus Accumbens Core Or Rostromedial Tegmental Nucleus                           | Frontiers In Neural Circuits                | 57 |
| 40 | Mrna-Based Sars-Cov-2 Vaccine Candidate CvnCoV Induces High Levels Of Virus-Neutralising Antibodies And Mediates Protection In Rodents                                       | Npj Vaccines                                | 55 |
| 41 | Change In The Single Amino Acid Site 83 In Rabies Virus Glycoprotein Enhances The Bbb Permeability And Reduces Viral Pathogenicity                                           | Frontiers In Cell And Developmental Biology | 55 |
| 42 | Cost-Effectiveness Of The National Dog Rabies Prevention And Control Program In Mexico, 1990-2015                                                                            | Plos Neglected Tropical Diseases            | 53 |
| 43 | Relatedness And Genetic Structure Of Big Brown Bat ( <i>Eptesicus Fuscus</i> ) Maternity Colonies In An Urban-Wildland Interface With Periodic Rabies Rabies Virus Outbreaks | Journal Of Wildlife Diseases                | 52 |
| 44 | Artesunate And Dihydroartemisinin Inhibit Rabies Virus Replication                                                                                                           | Virologica Sinica                           | 52 |
| 45 | The Successful Elimination Of Sylvatic Rabies Using Oral Vaccination Of Foxes In Slovenia                                                                                    | Viruses-Basel                               | 52 |
| 46 | Early Diagnosis Of Rabies Virus Infection By Rpa-Crispr Techniques In A Rat Model                                                                                            | Archives Of Virology                        | 52 |
| 47 | Evolutionary Analysis Of Rabies Virus Using The Partial Nucleoprotein And Glycoprotein Gene In Mumbai Region Of India                                                        | Journal Of General Virology                 | 52 |
| 48 | Rabies Virus Infection Is Associated With Alterations In The Expression Of Parvalbumin And Secretagogin In Mice Brain                                                        | Metabolic Brain Disease                     | 51 |
| 49 | Isolation And Characterization Of Cross-Reactive Human Monoclonal Antibodies That Potently Neutralize Australian Bat Lyssavirus Variants And Other Phylogroup 1 Lyssaviruses | Viruses-Basel                               | 51 |
| 50 | A Recombinase Polymerase Amplification Assay For Rapid Detection Of Rabies Virus                                                                                             | Scientific Reports                          | 51 |

|    |                                                                                                                                                                                       |                                                               |    |
|----|---------------------------------------------------------------------------------------------------------------------------------------------------------------------------------------|---------------------------------------------------------------|----|
| 51 | A Novel Oral Rabies Vaccine Enhances The Immunogenicity Through Increasing Dendritic Cells Activation And Germinal Center Formation By Expressing U-Omp19 In A Mouse Model            | Emerging Microbes & Infections                                | 51 |
| 52 | Probability Of A Zoonotic Spillover With Seasonal Variation                                                                                                                           | Infectious Disease Modelling                                  | 51 |
| 53 | Macrophage Membrane-Coated Nanocarriers Co-Modified By Rvg29 And Tpp Improve Brain Neuronal Mitochondria-Targeting And Therapeutic Efficacy In Alzheimer's Disease Mice               | Bioactive Materials                                           | 50 |
| 54 | Lentiviral Expression Of Rabies Virus Glycoprotein In The Rat Hippocampus Strengthens Synaptic Plasticity                                                                             | Cellular And Molecular Neurobiology                           | 50 |
| 55 | Inactivated Rabies Virus Vected Sars-Cov-2 Vaccine Prevents Disease In A Syrian Hamster Model                                                                                         | Plos Pathogens                                                | 49 |
| 56 | Novel And Re-Emerging Zoonotic Viral Diseases In India During Last Two Decades: An Overview                                                                                           | Journal Of Pharmaceutical Research International              | 48 |
| 57 | Delineating The Organization Of Projection Neuron Subsets In Primary Visual Cortex With Multiple Fluorescent Rabies Virus Tracing                                                     | Brain Structure & Function                                    | 47 |
| 58 | Population Structure Of Whitefly (Bemisia Tabaci) And The Link Between Vector Dynamics And Seasonal Incidence Of Yellow Mosaic Disease In Blackgram (Vigna Mungo)                     | Entomologia Experimentalis Et Applicata                       | 46 |
| 59 | Neuronal Replacement In Stem Cell Therapy For Stroke: Filling The Gap                                                                                                                 | Frontiers In Cell And Developmental Biology                   | 44 |
| 60 | Investigation Of Protective Level Of Rabies Antibodies In Vaccinated Dogs In Chennai, India                                                                                           | Veterinary Record Open                                        | 42 |
| 61 | Neglected Challenges In The Control Of Animal Rabies In China                                                                                                                         | One Health                                                    | 42 |
| 62 | Cerebral Cysticercosis In A Wild Bengal Tiger (Panthera Tigris Tigris) In Bhutan: A First Report In Non-Domestic Felids                                                               | International Journal For Parasitology-Parasites And Wildlife | 42 |
| 63 | Safety And Efficacy Of Rabies Immunoglobulin In Pediatric Patients With Suspected Exposure                                                                                            | Human Vaccines & Immunotherapeutics                           | 41 |
| 64 | Shared Odds Of Borrelia And Rabies Virus Exposure In Serbia                                                                                                                           | Pathogens                                                     | 40 |
| 65 | Rabies Virus Glycoprotein Enhances Spatial Memory Via The PdZ Binding Motif                                                                                                           | Journal Of Neurovirology                                      | 40 |
| 66 | Analyses Of Cell Death Mechanisms Related To Amino Acid Substitution At Position 95 In The Rabies Virus Matrix Protein                                                                | Journal Of General Virology                                   | 40 |
| 67 | Serosurveillance Of Rabies Antibodies In Dogs In Mumbai Region By Using Indirect Elisa                                                                                                | Comparative Immunology Microbiology And Infectious Diseases   | 38 |
| 68 | Full-Genome Sequences And Phylogenetic Analysis Of Archived Danish European Bat Lyssavirus 1 (Eblv-1) Emphasize A Higher Genetic Resolution And Spatial Segregation For Sublineage 1a | Viruses-Basel                                                 | 38 |
| 69 | Analysis Of Time Delayed Rabies Model In Human And Dog Populations With Controls                                                                                                      | Afrika Matematika                                             | 38 |
| 70 | Immunocontraceptive Potential Of A GnRh Receptor-Based Fusion Recombinant Protein                                                                                                     | Journal Of Genetic Engineering And Biotechnology              | 36 |
| 71 | Begomoviruses Affecting Pulse And Vegetable Crops Are Unevenly Distributed In Distinct Agroecological Zones Of The Eastern India                                                      | Journal Of Phytopathology                                     | 36 |
| 72 | Blood Metabolic And Hematology Parameters And Survivorship In Mice After Application Of The Rabies Challenge Virus Standard In Vaccine Potency Test                                   | Acta Scientiae Veterinariae                                   | 34 |
| 73 | A Preliminary Investigation Of Exposure To Rabies Virus In Selected Wildlife In The Kruger National Park, South Africa                                                                | Koedoe                                                        | 34 |
| 74 | Clofazimine: A Promising Inhibitor Of Rabies Virus                                                                                                                                    | Frontiers In Pharmacology                                     | 33 |
| 75 | Stool Serology: Development Of A Non-Invasive Immunological Method For The Detection Of Enterovirus-Specific Antibodies In Congo Gorilla Faeces                                       | Microorganisms                                                | 32 |

|     |                                                                                                                                                                                                                         |                                                       |    |
|-----|-------------------------------------------------------------------------------------------------------------------------------------------------------------------------------------------------------------------------|-------------------------------------------------------|----|
| 76  | Quantitative Characterization Of The T Cell Receptor Repertoires Of Human Immunized By Rabies Virus Vaccine                                                                                                             | Human Vaccines & Immunotherapeutics                   | 31 |
| 77  | Rabies In Tunisia: A Spatio-Temporal Analysis In The Region Of Capbon-Nabeul                                                                                                                                            | Acta Tropica                                          | 31 |
| 78  | Knowledge, Attitudes And Practices Regarding Rabies Among Community Members: A Cross-Sectional Study In Songan Village, Bali, Indonesia                                                                                 | International Maritime Health                         | 30 |
| 79  | Ecology Of Arctic Rabies: 60 Years Of Disease Surveillance In The Warming Climate Of Northern Canada                                                                                                                    | Zoonoses And Public Health                            | 29 |
| 80  | Rabies And The Heart                                                                                                                                                                                                    | Cardiology Research                                   | 28 |
| 81  | Development Of Monoclonal Antibodies For Detection Of Conserved And Variable Epitopes Of Large Protein Of Rabies Virus                                                                                                  | Viruses-Basel                                         | 28 |
| 82  | Safety And Immunogenicity Of Rabies Vaccine As 4-Dose Essen Intramuscular Regimen For Post Exposure Prophylaxis: A Non-Randomized, Comparative Controlled Study                                                         | Human Vaccines & Immunotherapeutics                   | 27 |
| 83  | Genetic Identification Of A Rabies Virus From An Insectivorous Bat In An Urban Area Of Rio Grande Do Sul, Brazil                                                                                                        | Brazilian Journal Of Microbiology                     | 25 |
| 84  | Proof-Of-Concept Of A Low-Dose Unmodified Mrna-Based Rabies Vaccine Formulated With Lipid Nanoparticles In Human Volunteers: A Phase 1 Trial                                                                            | Vaccine                                               | 24 |
| 85  | Long-Term Immunity And The Effect Of One Or Two Booster Doses With A Lyophilized Human Rabies Vaccine (Human Diploid Cells) At 10 Years Post Primary Vaccination In China                                               | Human Vaccines & Immunotherapeutics                   | 23 |
| 86  | Evaluation Of The Effect Of Hydroethanolic Root Extract And Solvent Fractions Of Cyphostemma Adenocaulis (Steud. Ex A. Rich) Descoings Ex Wild & Drummond On Cell-Mediated Immune Response And Blood Cell Count In Mice | Evidence-Based Complementary And Alternative Medicine | 23 |
| 87  | Systematic Booster After Rabies Pre-Exposure Prophylaxis To Alleviate Rabies Antibody Monitoring In Individuals At Risk Of Occupational Exposure                                                                        | Vaccines                                              | 22 |
| 88  | Rabies-Infected Dogs At Slaughterhouses: A Potential Risk Of Rabies Transmission Via Dog Trading And Butchering Activities In Vietnam                                                                                   | Zoonoses And Public Health                            | 19 |
| 89  | Lesions Associated With Bartonella Taylorii-Like Bacterium Infection In A Free-Ranging, Young-Of-The-Year Raccoon From Prince Edward Island, Canada                                                                     | Journal Of Veterinary Diagnostic Investigation        | 19 |
| 90  | Local Surveillance And Control Of Raccoon Rabies Virus In Striped Skunks (Mephitis Mephitis) In Southwestern New Brunswick, Canada                                                                                      | Journal Of Wildlife Diseases                          | 18 |
| 91  | Editorial: Mrna Vaccines And Future Epidemic, Pandemic, And Endemic Zoonotic Virus Infections                                                                                                                           | Medical Science Monitor                               | 16 |
| 92  | Rabies Virus Exposure In Wild Lowland Tapirs (Tapirus Terrestris) From Three Brazilian Biomes                                                                                                                           | Journal Of Wildlife Diseases                          | 14 |
| 93  | Safety, Pharmacokinetics, And Neutralizing Activity Of Syn023, A Mixture Of Two Novel Antirabies Monoclonal Antibodies Intended For Use In Postrabies Exposure Prophylaxis                                              | Clinical Pharmacology In Drug Development             | 14 |
| 94  | A Case Of Human Rabies With A Long Incubation Period In Wuhan                                                                                                                                                           | Idcases                                               | 14 |
| 95  | Negligible Risk Of Rabies Importation In Dogs Thirty Days After Demonstration Of Adequate Serum Antibody Titer                                                                                                          | Vaccine                                               | 13 |
| 96  | Covid-19 Impacts On Agriculture And Food Systems Of India                                                                                                                                                               | International Journal Of Modern Agriculture           | 11 |
| 97  | Development Of An Assay For Detecting The Residual Viable Virus In Inactivated Rabies Vaccine By Enzyme-Linked Immunosorbent Assay                                                                                      | Biologicals                                           | 9  |
| 98  | The Serotonin Reuptake Inhibitor Fluoxetine Inhibits Sars-Cov-2 In Human Lung Tissue                                                                                                                                    | Scientific Reports                                    | 9  |
| 99  | Neurological Recovery With Serological Response In A Rabies Survivor On Long-Term Follow-Up                                                                                                                             | Tropical Doctor                                       | 5  |
| 100 | Us-Japan Cooperative Medical Sciences Program: 22nd International Conference On Emerging Infectious Diseases In The Pacific Rim                                                                                         | Virology                                              | 0  |

---
